# Supplementary material
Source: PubMed Central journal article supplement (PMC3714372)
Supplement: NIHMS456828-supplement-429_2013_531_MOESM2_ESM.pdf [file NIHMS456828-supplement-429_2013_531_MOESM2_ESM.pdf]

**Differential distribution of phospholipase C beta isoforms and diacylglycerol kinase beta in rodents cerebella corroborates the division of unipolar brush cells into two major subtypes**Gabriella Sekerková<sup>1</sup>, Masahiko Watanabe<sup>2</sup>, Marco Martina<sup>3</sup>, Enrico Mugnaini<sup>1</sup>Corresponding author: Gabriella Sekerkova; Feinberg School of Medicine, Northwestern University; Chicago, IL 60611  
e-mail: g-sekerkova@northwestern.edu**Supplementary Table 1.** Densities (N/ 0.01 mm<sup>2</sup>) of mGluR1 $\alpha$ <sup>+</sup> and CR<sup>+</sup> UBC in 25  $\mu$ m-thick coronal sections

|       | Cerebellar lobules | UBC type                     | Zones<br>midline $\leftrightarrow$ lateral |                |                |                |                |                |                |
|-------|--------------------|------------------------------|--------------------------------------------|----------------|----------------|----------------|----------------|----------------|----------------|
|       |                    |                              | 1                                          | 2              | 3              | 4              | 5              | 6              | 7              |
| Rat   | IXa                | mGluR1 $\alpha$ <sup>+</sup> | 1.4 $\pm$ 1.9                              | 2.2 $\pm$ 1.4  | 1.4 $\pm$ 0.7  | 1.5 $\pm$ 0.2  | 1.6 $\pm$ 0.3  | 1.7 $\pm$ 0.9  |                |
| N=2   |                    | Calretinin <sup>+</sup>      | 0.4 $\pm$ 0.02                             | 0.4 $\pm$ 0.02 | 0.4 $\pm$ 0.02 | 0.4 $\pm$ 0.02 | 0.4 $\pm$ 0.02 | 0.4 $\pm$ 0.02 |                |
|       | IXc/d*; r2         | mGluR1 $\alpha$ <sup>+</sup> | 10.6 $\pm$ 1.8                             | 4.8 $\pm$ 1.4  | 2.8 $\pm$ 0.7  | 3.6 $\pm$ 0.3  | 8.1 $\pm$ 2.0  | 2.3 $\pm$ 1.0  | 6.1 $\pm$ 2.2  |
|       |                    | Calretinin <sup>+</sup>      | <b>9.1</b> $\pm$ 0.3                       | 4.8 $\pm$ 1.31 | 3.7 $\pm$ 0.7  | 2.9 $\pm$ 0.8  | 5.4 $\pm$ 1.0  | 3.1 $\pm$ 0.2  | 2.6 $\pm$ 0.1  |
|       | X, dorsal leaflet  | mGluR1 $\alpha$ <sup>+</sup> | 13.8 $\pm$ 0.5                             | 10.9 $\pm$ 2.1 | 3.5 $\pm$ 1.9  | 3.2 $\pm$ 1.4  | 5.1 $\pm$ 1.5  | 7.4 $\pm$ 2.4  | 7.6 $\pm$ 0.8  |
|       |                    | Calretinin <sup>+</sup>      | 6.3 $\pm$ 0.1                              | 4.9 $\pm$ 0.3  | 3.0 $\pm$ 0.3  | 2.5 $\pm$ 0.6  | 2.6 $\pm$ 0.1  | 3.4 $\pm$ 0.3  | 3.0 $\pm$ 0.1  |
|       | X, ventral leaflet | mGluR1 $\alpha$ <sup>+</sup> | <b>18.8</b> $\pm$ 0.2                      | 18.4 $\pm$ 2.1 | 8.8 $\pm$ 2.1  | 8.3 $\pm$ 1.7  | 8.7 $\pm$ 0.4  | 9.8 $\pm$ 1.7  | 9.3 $\pm$ 0.8  |
|       |                    | Calretinin <sup>+</sup>      | 3.1 $\pm$ 0.6                              | 5.0 $\pm$ 0.9  | 3.9 $\pm$ 0.7  | 3.5 $\pm$ 0.7  | 3.1 $\pm$ 1.5  | 3.9 $\pm$ 0.7  | 2.7 $\pm$ 0.6  |
| Mouse | IXa                | mGluR1 $\alpha$ <sup>+</sup> | 5.5 $\pm$ 0.03                             | 2.6 $\pm$ 0.4  | 3.7 $\pm$ 0.3  | 1.3 $\pm$ 0.5  | 1.6 $\pm$ 1.2  | 1.3 $\pm$ 0.4  |                |
| N=2   |                    | Calretinin <sup>+</sup>      | 0.2 $\pm$ 0.1                              | 0.2 $\pm$ 0.1  | 0.2 $\pm$ 0.1  | 0.2 $\pm$ 0.1  | 0.2 $\pm$ 0.1  | 0.2 $\pm$ 0.1  |                |
|       | IXc; r2            | mGluR1 $\alpha$ <sup>+</sup> | <b>32.2</b> $\pm$ 0.1                      | 14.1 $\pm$ 0.4 | 8.3 $\pm$ 1.5  | 6.4 $\pm$ 3.0  | 10.9 $\pm$ 1.7 | 3.9 $\pm$ 1.8  | 4.1 $\pm$ 1.0  |
|       |                    | Calretinin <sup>+</sup>      | 14.6 $\pm$ 1.8                             | 5.6 $\pm$ 0.1  | 5.1 $\pm$ 3.3  | 3.8 $\pm$ 1.4  | 10.5 $\pm$ 2.9 | 4.7 $\pm$ 1.1  | 7.7 $\pm$ 3.3  |
|       | X, dorsal leaflet  | mGluR1 $\alpha$ <sup>+</sup> | <b>12.1</b> $\pm$ 1.9                      | 12.1 $\pm$ 1.9 | 7.5 $\pm$ 1.5  | 8.5 $\pm$ 1.1  | 11.7 $\pm$ 0.7 | 8.5 $\pm$ 2.5  |                |
|       |                    | Calretinin <sup>+</sup>      | 12.5 $\pm$ 0.4                             | 10.4 $\pm$ 0.1 | 5.8 $\pm$ 0.3  | 5.8 $\pm$ 1.9  | 5.9 $\pm$ 0.6  | 10.2 $\pm$ 0.9 |                |
|       | X, lateral zone    | mGluR1 $\alpha$ <sup>+</sup> |                                            |                |                |                |                |                | 18.8 $\pm$ 0.9 |
|       |                    | Calretinin <sup>+</sup>      |                                            |                |                |                |                |                |                |
|       | X, ventral leaflet | mGluR1 $\alpha$ <sup>+</sup> | 17 $\pm$ 1.7                               | 19.4 $\pm$ 2.6 | 14.3 $\pm$ 0.1 | 10.6 $\pm$ 2.3 | 14.3 $\pm$ 2.7 | 13.9 $\pm$ 0.1 |                |
|       |                    | Calretinin <sup>+</sup>      | 3.8 $\pm$ 1.4                              | 7.4 $\pm$ 0.6  | 5.0 $\pm$ 0.9  | 4.9 $\pm$ 1.4  | 5.3 $\pm$ 0.7  | 10.8 $\pm$ 3.1 |                |

Folial medio-lateral zones in rat and mouse cerebella are illustrated in Fig.10 and Fig.11, respectively.

\*In some rat specimens a shallow indentation subdivides the last folia of uvula into IXc and IXd.

**Supplementary Table 2.** Densities (N/ 0.01 mm<sup>2</sup>) of mGluR1 $\alpha$ <sup>+</sup> and CR<sup>+</sup> UBC in 25  $\mu$ m-thick sagittal cerebellar sections.

| Cerebellar lobules / regions |                                                     | Medial sections              |                         | Lateral sections             |                         |
|------------------------------|-----------------------------------------------------|------------------------------|-------------------------|------------------------------|-------------------------|
|                              |                                                     | mGluR1 $\alpha$ <sup>+</sup> | Calretinin <sup>+</sup> | mGluR1 $\alpha$ <sup>+</sup> | Calretinin <sup>+</sup> |
| Rat                          | VIII                                                | 0.9 $\pm$ 0.1                | 0.4 $\pm$ 0.16          | 1.2 $\pm$ 0.2                | 0.1 $\pm$ 0.1           |
| N=2                          | IXa                                                 | 3.1 $\pm$ 0.1                | 1.0 $\pm$ 0.54          | 3.0 $\pm$ 0.8                | 0.4 $\pm$ 0.3           |
|                              | Transition zone between IXa and IXb (UBC void area) | 0.9 $\pm$ 0.1                | 0.2 $\pm$ 0.01          | 1.0 $\pm$ 0.03               | 0.1 $\pm$ 0.02          |
|                              | IXb & IXc;r1                                        | 8.0 $\pm$ 3.0                | 1.3 $\pm$ 0.01          | 4.2 $\pm$ 0.6                | 0.4 $\pm$ 0.2           |
|                              | IXc/d*; r2                                          | 10.8 $\pm$ 0.3               | 2.8 $\pm$ 0.1           | 6.0 $\pm$ 1.2                | 2.4 $\pm$ 0.4           |
|                              | IXc/d*; r3                                          | 10.9 $\pm$ 1.4               | 8.9 $\pm$ 0.03          | 5.9 $\pm$ 0.9                | 6.1 $\pm$ 0.9           |
|                              | Transition zone between IXc/d and X (tz)            | 16.0 $\pm$ 2.2               | 11.7 $\pm$ 0.01         | 5.2 $\pm$ 0.7                | <b>6.3</b> $\pm$ 2.0    |
|                              | X, dorsal leaflet                                   | 12.2 $\pm$ 0.5               | 7.2 $\pm$ 0.1           | 5.8 $\pm$ 0.6                | 6.1 $\pm$ 1.9           |
|                              | X, ventral leaflet                                  | <b>20.3</b> $\pm$ 2.7        | 6.0 $\pm$ 0.5           | <b>9.6</b> $\pm$ 1.5         | 5.1 $\pm$ 0.2           |
|                              | X, medullary vellum border (mb)                     | 11.4 $\pm$ 0.6               | 4.1 $\pm$ 1.2           | <b>9.7</b> $\pm$ 2.6         | 1.6 $\pm$ 0.3           |
| Mouse                        | VIII                                                | 1.4 $\pm$ 0.6                | 0.1 $\pm$ 0.0           | 1.4 $\pm$ 1.0                | 0.03 $\pm$ 0.03         |
| N=3                          | IXa                                                 | 1.9 $\pm$ 0.1                | 0.1 $\pm$ 0.0           | 1.6 $\pm$ 0.1                | 0.03 $\pm$ 0.03         |
|                              | Transition zone between IXa and IXb (UBC void area) | 0                            | 0                       | 0                            | 0                       |
|                              | IXb & IXc;r1                                        | 6.7 $\pm$ 3.0                | 0.8 $\pm$ 0.2           | 6.6 $\pm$ 0.8                | 1.2 $\pm$ 0.5           |
|                              | IXc;r2                                              | 12.0 $\pm$ 5.9               | 2.9 $\pm$ 0.6           | 7.9 $\pm$ 1.3                | <b>5.5</b> $\pm$ 3.3    |
|                              | Transition zone between IXc and X (tz)              | <b>25.5</b> $\pm$ 5.5        | <b>14.0</b> $\pm$ 3.5   | 8.4 $\pm$ 2.1                | 7.0 $\pm$ 4.0           |
|                              | X, dorsal leaflet                                   | 10.5 $\pm$ 0.9               | 5.3 $\pm$ 0.3           | 8.2 $\pm$ 2.6                | 4.2 $\pm$ 1.7           |
|                              | X, ventral leaflet                                  | 23.4 $\pm$ 4.8               | 3.7 $\pm$ 1.5           | <b>12.0</b> $\pm$ 3.1        | 4.7 $\pm$ 0.3           |
|                              | X, medullary vellum border -(mb)                    | 20.8 $\pm$ 6.3               | 10.8 $\pm$ 4.5          | 7.1 $\pm$ 3.2                | <b>5.4</b> $\pm$ 4.6    |

Medial sections were chosen at a distance 0-150  $\mu$ m (rat) / 0-70  $\mu$ m (mouse) from the midline. Lateral sections were chosen at a distance 900-1200  $\mu$ m (rat) / 600-700  $\mu$ m (mouse) from the midline. \*In some rat specimens a shallow indentation subdivides the last folia of uvula into IXc and IXd.

**Supplementary Table 3.** Densities (N / 0.01 mm<sup>2</sup>) of mGluR1 $\alpha$ <sup>+</sup> and CR<sup>+</sup> UBC in 25  $\mu$ m-thick coronal cerebellar sections.

|       | Cerebellar lobules / regions                                                | mGluR1 $\alpha$ <sup>+</sup> | Calretinin <sup>+</sup> |
|-------|-----------------------------------------------------------------------------|------------------------------|-------------------------|
| Rat   | Flocculus                                                                   | 6.7 $\pm$ 1.7                | 2.9 $\pm$ 0.8           |
| N=2   | Paraflocculus –vPFI;r1                                                      | 22.4 $\pm$ 1.3               | 12.7 $\pm$ 1.4          |
|       | Paraflocculus –vPFI;r2                                                      | 7.9 $\pm$ 0.04               | 1.5 $\pm$ 0.02          |
|       | Paraflocculus – r3 & r4                                                     | 1.0 $\pm$ 0.1                | 0.1 $\pm$ 0.01          |
| Mouse | Flocculus                                                                   | 17.2 $\pm$ 1.6               | 2.3 $\pm$ 0.2           |
| N=2   | Transition zone between paraflocculus and flocculus (tz) – includes vPFL;r1 | 26.5 $\pm$ 1.1               | 11.8 $\pm$ 0.7          |
|       | Paraflocculus – vPFI;r2                                                     | 11.6 $\pm$ 0.5               | 0.1 $\pm$ 0.1           |
|       | Paraflocculus –r3                                                           | 3.8 $\pm$ 1.2                | 0.1 $\pm$ 0.1           |
|       | Paraflocculus –r4                                                           | 0.9 $\pm$ 0.01               | 0.1 $\pm$ 0.1           |
